# Supplementary material for: Water-soluble chiral tetrazine derivatives: towards the application of circularly polarized luminescence from upper-excited states to photodynamic therapy
Source: Royal Society of Chemistry journal article supplement (doi:10.1039/c9sc00264b), 2019-01-01
Supplement: c9sc00264b1.pdf [file c9sc00264b1.pdf]

## Electronic Supplementary Information

# Water-soluble Chiral Tetrazine Derivatives: Towards the Application of Circularly Polarized Luminescence from Upper-Excited States to Photodynamic Therapy

Tingchao He,<sup>a</sup> Can Ren,<sup>a</sup> Yu Luo,<sup>b</sup> Qi Wang,<sup>c</sup> Junzi Li,<sup>a</sup> Xiaodong Lin,<sup>a</sup> Chuanxiang Ye,<sup>a</sup> Wenbo Hu,<sup>\*,c</sup> and Junmin Zhang<sup>\*,b</sup>

<sup>a</sup>College of Physics and Energy, Shenzhen University, Shenzhen 518060, China.

<sup>b</sup>College of Chemistry and Environmental Engineering, Shenzhen University, Shenzhen 518060, China

<sup>c</sup>Key Laboratory of Flexible Electronics (KLOFE) & Institute of Advanced Materials (IAM), Jiangsu National Synergetic Innovation Center for Advanced Materials (SICAM), Nanjing Tech University (NanjingTech), Nanjing 211816, China

### **Corresponding Author**

\*E-mail: zhangjm@szu.edu.cn (J.Z.).

\*E-mail: iamwbhu@njtech.edu.cn (W.H.).

## The synthesis procedures of tetrazine derivatives<sup>1</sup>

**(R)-6-chloro-N-(1-phenylethyl)-1,2,4,5-tetrazin-3-amine:** 2,4,6-Collidine (0.44 mmol, 53.32 mg, 2.2 eq) is added to a solution of 3,6-dichlorotetrazine (0.2 mmol, 30.19 mg, 1.0 eq) and (R)-(+)-1-phenylethylamine (0.44 mmol, 53.24 mg, 2.2 eq) in dichloromethane (3 mL). The resulting solution is stirred overnight at room temperature then concentrated and purified by column chromatography (eluent: petroleum ether/dichloromethane at 40/1) to yield 35 mg of (R)-6-chloro-N-(1-phenylethyl)-1,2,4,5-tetrazin-3-amine as an orange-red liquid.  $[\alpha]_{20}^D = +44.8$  (c = 0.5, CH<sub>3</sub>OH) <sup>1</sup>H NMR (400 MHz, CDCl<sub>3</sub>) δ 7.40 – 7.25 (m, 5H, ArH), 6.54 (d, J = 5.3 Hz, 1H, NH), 5.25 (p, J = 7.0 Hz, 1H, CH), 1.68 (d, J = 6.9 Hz, 3H, CH<sub>3</sub>). <sup>13</sup>C NMR (100 MHz, CDCl<sub>3</sub>) δ 160.67, 160.61, 141.86, 128.84, 127.88, 126.13, 51.45, 22.28. HRMS (ESI) m/z: calcd for C<sub>10</sub>H<sub>11</sub>ClN<sub>5</sub><sup>+</sup> [M + H]<sup>+</sup>: 236.0697, found: 236.0703.

**(S)-6-chloro-N-(1-phenylethyl)-1,2,4,5-tetrazin-3-amine:** The synthesis step refers to another enantiomer.  $[\alpha]_{20}^D = -48.0$  (c = 0.5, CH<sub>3</sub>OH) <sup>1</sup>H NMR (400 MHz, CDCl<sub>3</sub>) δ 7.38 – 7.23 (m, 5H, ArH), 6.62 (d, J = 6.9 Hz, 1H, NH), 5.23 (p, J = 7.0 Hz, 1H, CH), 1.66 (d, J = 6.9 Hz, 3H, CH<sub>3</sub>). <sup>13</sup>C NMR (100 MHz, CDCl<sub>3</sub>) δ 160.68, 160.60, 141.91, 128.86, 127.90, 126.17, 51.48, 22.33. HRMS (ESI) m/z: calcd for C<sub>10</sub>H<sub>11</sub>ClN<sub>5</sub><sup>+</sup> [M + H]<sup>+</sup>: 236.0697, found: 236.0703.

**(S)-6-chloro-N-(hexan-2-yl)-1,2,4,5-tetrazin-3-amine:** 2,4,6-Collidine (0.44 mmol, 53.32 mg, 2.2 eq) is added to a solution of 3,6-dichlorotetrazine (0.2 mmol, 30.19 mg, 1.0 eq) and (S)-(+)-2-aminohexane (0.44 mmol, 44.52 mg, 2.2 eq) in dichloromethane (3 mL). The resulting solution is stirred overnight at room temperature then concentrated and purified by column chromatography (eluent: petroleum ether/dichloromethane at 40/1) to yield 30 mg of (S)-6-chloro-N-(hexan-2-yl)-1,2,4,5-tetrazin-3-amine as an orange-red liquid.  $[\alpha]_{20}^D = -10.0$  (c = 0.5, CH<sub>3</sub>OH) <sup>1</sup>H NMR (400 MHz, CDCl<sub>3</sub>) δ 5.97 (s, 1H), 4.18 (dt, J = 13.5, 6.7 Hz, 1H, CH), 1.71 – 1.54 (m, 2H, CH<sub>2</sub>), 1.35 (m, J = 2.0 Hz, 4H, CH<sub>2</sub>CH<sub>2</sub>), 1.31 (d, J = 6.5 Hz, 3H, CH<sub>3</sub>), 0.89 (t, J = 6.9 Hz, 3H, CH<sub>3</sub>). <sup>13</sup>C NMR (100 MHz, CDCl<sub>3</sub>) δ 161.10, 160.12, 47.81, 36.15, 28.01, 22.45, 20.27, 13.90. HRMS (ESI) m/z: calcd for C<sub>8</sub>H<sub>15</sub>ClN<sub>5</sub><sup>+</sup> [M + H]<sup>+</sup>: 216.1010, found: 216.1012.

**(R)-6-chloro-N-(hexan-2-yl)-1,2,4,5-tetrazin-3-amine:** The synthesis step refers to another enantiomer.  $[\alpha]_{20}^D = +13.4$  (c = 0.5, CH<sub>3</sub>OH) <sup>1</sup>H NMR (400 MHz, CDCl<sub>3</sub>) δ 5.98 (s, 1H), 4.18 (dt, J = 14.8, 6.6 Hz, 1H, CH), 1.67 – 1.58 (m, 2H, CH<sub>2</sub>), 1.34 (m, J = 2.0 Hz, 4H, CH<sub>2</sub>CH<sub>2</sub>), 1.31 (d, J = 6.5 Hz, 3H, CH<sub>3</sub>), 0.89 (t, J = 7.0 Hz, 3H, CH<sub>3</sub>). <sup>13</sup>C NMR (100 MHz, CDCl<sub>3</sub>) δ 161.10, 160.12, 47.82, 36.15, 28.03, 22.46, 20.28, 13.93. HRMS (ESI) m/z: calcd for C<sub>8</sub>H<sub>15</sub>ClN<sub>5</sub><sup>+</sup> [M + H]<sup>+</sup>: 216.1010, found: 216.1012.

## The details of photodynamic therapy activity on cancer cells

*Cell Culture:* In growth media (DMEM supplemented with fetal bovine serum (10%), streptomycin (100.0 mg/L) and penicillin (100 IU/mL)), HeLa cells were cultured and maintained in a humidified atmosphere of 5% carbon dioxide at 37 °C for following use.

*Cell imaging:* HeLa cells were seeded in glass-bottom dishes and grown till 70 ~ 80% confluency. Subsequently, cells were incubated with 1-R (20  $\mu$ M) for 4 h, and then further incubated with 200 nM of the LysoTracker™ Red DND-99 (Thermo Fisher Scientific). Cells were then washed three times with PBS, then imaged with an inverting-typed confocal microscope (Zeiss LSM 880 meta NLO). Images of 1-R stained cells were collected at 420 ~ 480 nm by using a laser excitation wavelength at 405 nm. Images of LysoTracker™ Red stained cells were collected at 620 ~ 650 nm by using a laser excitation wavelength at 559 nm. Background signals of all images were verified to be nearly zero by imaging the same cells treated with a buffer control.

*ROS imaging in HeLa cells.* HeLa cells were seeded in glass-bottom dishes and grown till 70 ~ 80% confluences. Subsequently, cells were incubated with 1-R (20  $\mu$ M) for 4 h. Then, according to manufacturer's instructions, ROS probe (DCFH-DA, Thermo Fisher Scientific) was added and incubated for 20 min. After that, cells were irradiated with a white light LED source for 0, 5 or 10 min. Images from DCFH-DA solution were recorded in 500-530 nm emission range with the excitation wavelength of 488 nm using confocal microscope (Zeiss LSM 880 meta NLO).

*Confocal Imaging of Photoinduced Cell Death:* After HeLa cells were incubated with 1-R (20  $\mu$ M) for 4 h, these cells were further stained with Calcein-AM and PI and irradiated under white light LED source for 10 min. Then, the cells were incubated another 4 h for apoptosis. Finally, confocal microscope (Zeiss LSM 880 meta NLO) was used to simultaneously acquire images of Calcein-AM emission (500-550 nm) and PI emission (600-650 nm). The excitation wavelength was at 488 nm.

*Flow Cytometry:* HeLa cells were seeded in the six-well plates for 24 h. Then 1-R (20  $\mu$ M) was added for 4 h incubation. The medium was then replaced with fresh culture medium and irradiated by white light LED source for 10 min irradiation. Then, cells were incubated for another 4 hours to apoptosis. Afterward, these cells were stained with Annexin V-FITC/PI according to the manufacturer's instruction, trypsinized, harvested, rinsed with PBS, resuspended, and subjected to perform flow cytometric assay using BD FACSCanto II flow cytometry.

*Cellular cytotoxicity:* The cytotoxicity of materials is very important for bio-application. So, we use HeLa cells to carry out MTT assays. In a 96-well, HeLa cells was well plated for 24 h. Then, different concentrations of 1-R were added. After an occupation of 12 h, 20  $\mu$ L MTT solution (20  $\mu$ L, 5 mg mL<sup>-1</sup>) was added to each well and incubated for another 4 h. After that, we remove supernatant and add 200  $\mu$ L dimethyl sulfoxide to every well. The absorbance intensity was recorded by a PowerWave XS/XS2 microplate spectrophotometer at 490 nm. The cellular viability relative to the untreated cells (control group) was calculated according to our previous paper.<sup>2</sup>

*Statistical analysis:* The statistical analysis of the samples was undertaken using a Student's t-test, and *p*-values < 0.05 were considered statistically significant. All data reported are means  $\pm$  standard deviations, unless otherwise noted.

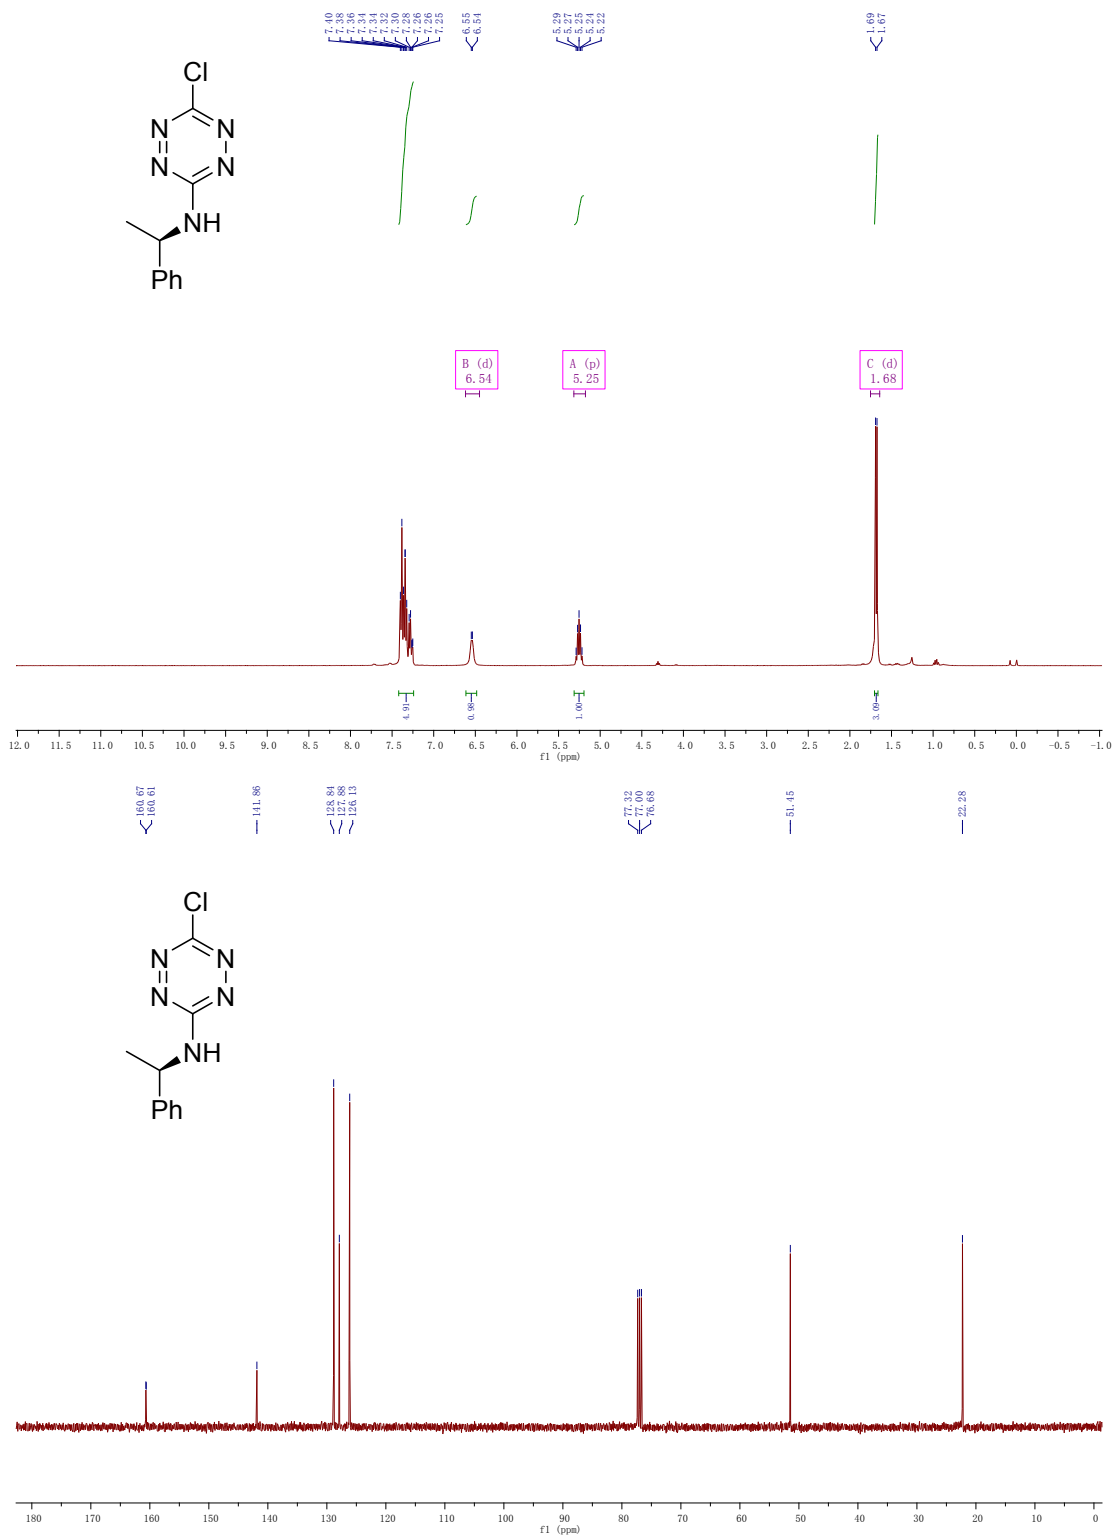

**Fig. S1** <sup>1</sup>H and <sup>13</sup>C NMR spectra of (R)-6-chloro-N-(1-phenylethyl)-1,2,4,5-tetrazin-3-amine

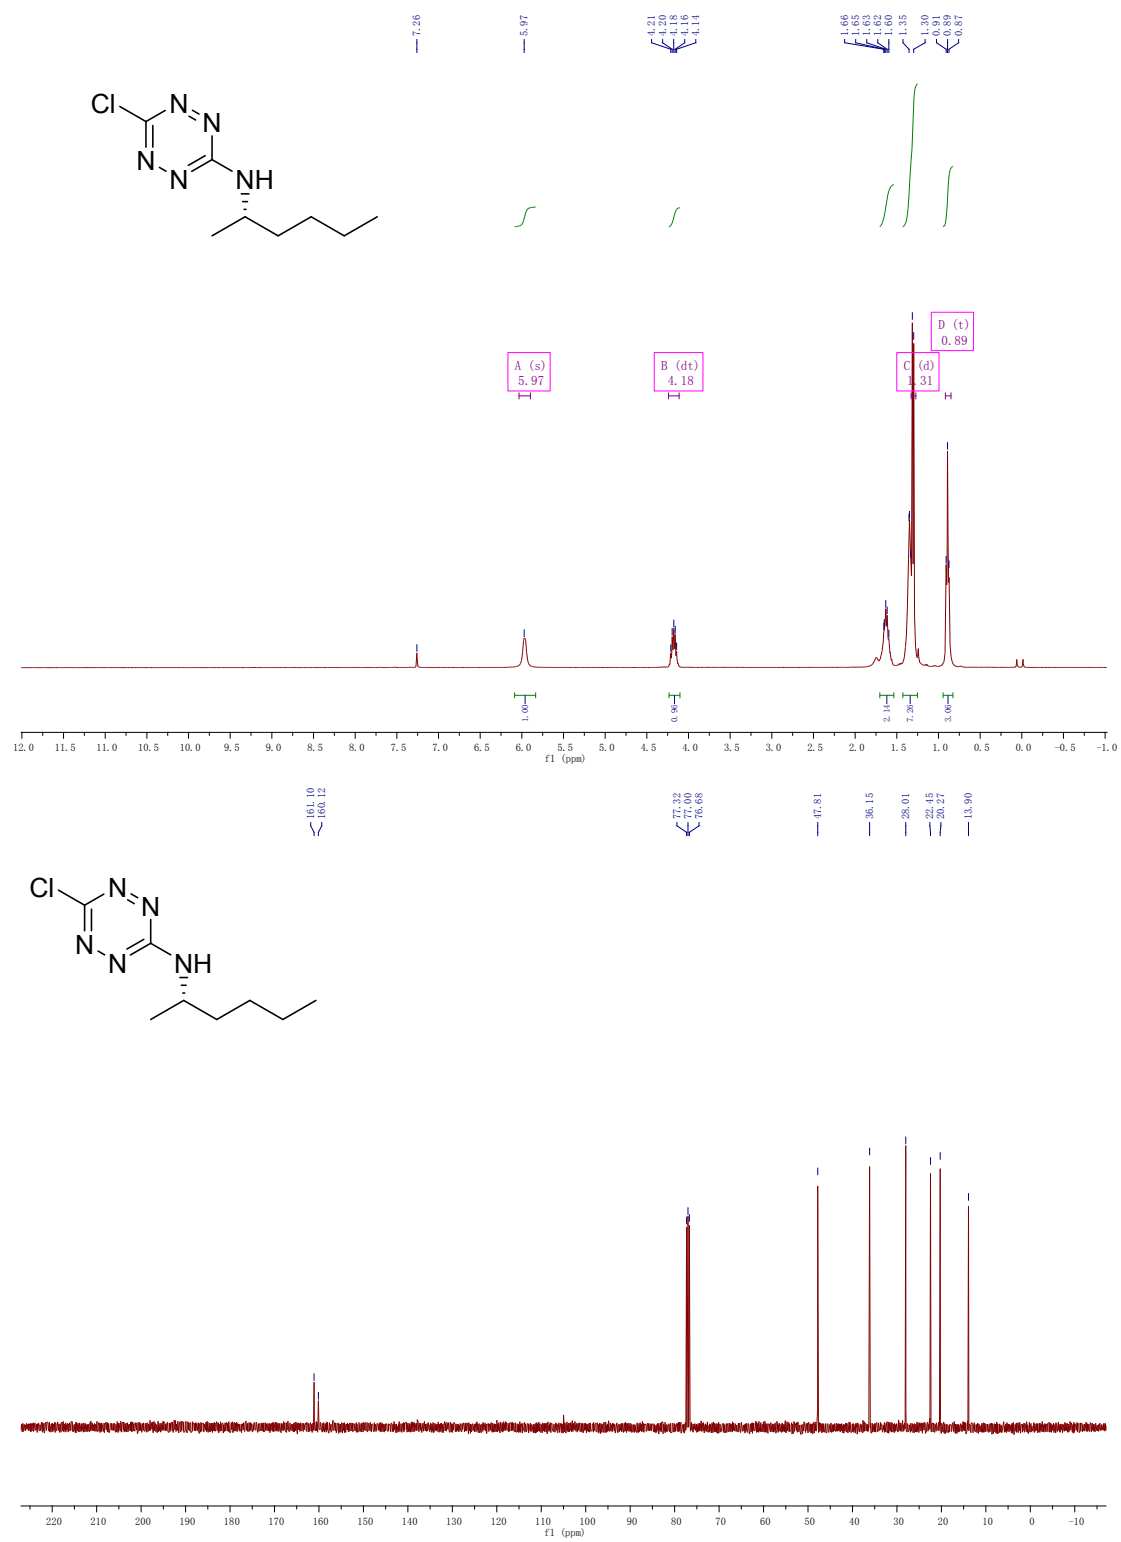

**Fig. S2** <sup>1</sup>H and <sup>13</sup>C NMR spectra of (S)-6-chloro-N-(hexan-2-yl)-1,2,4,5-tetrazin-3-amine

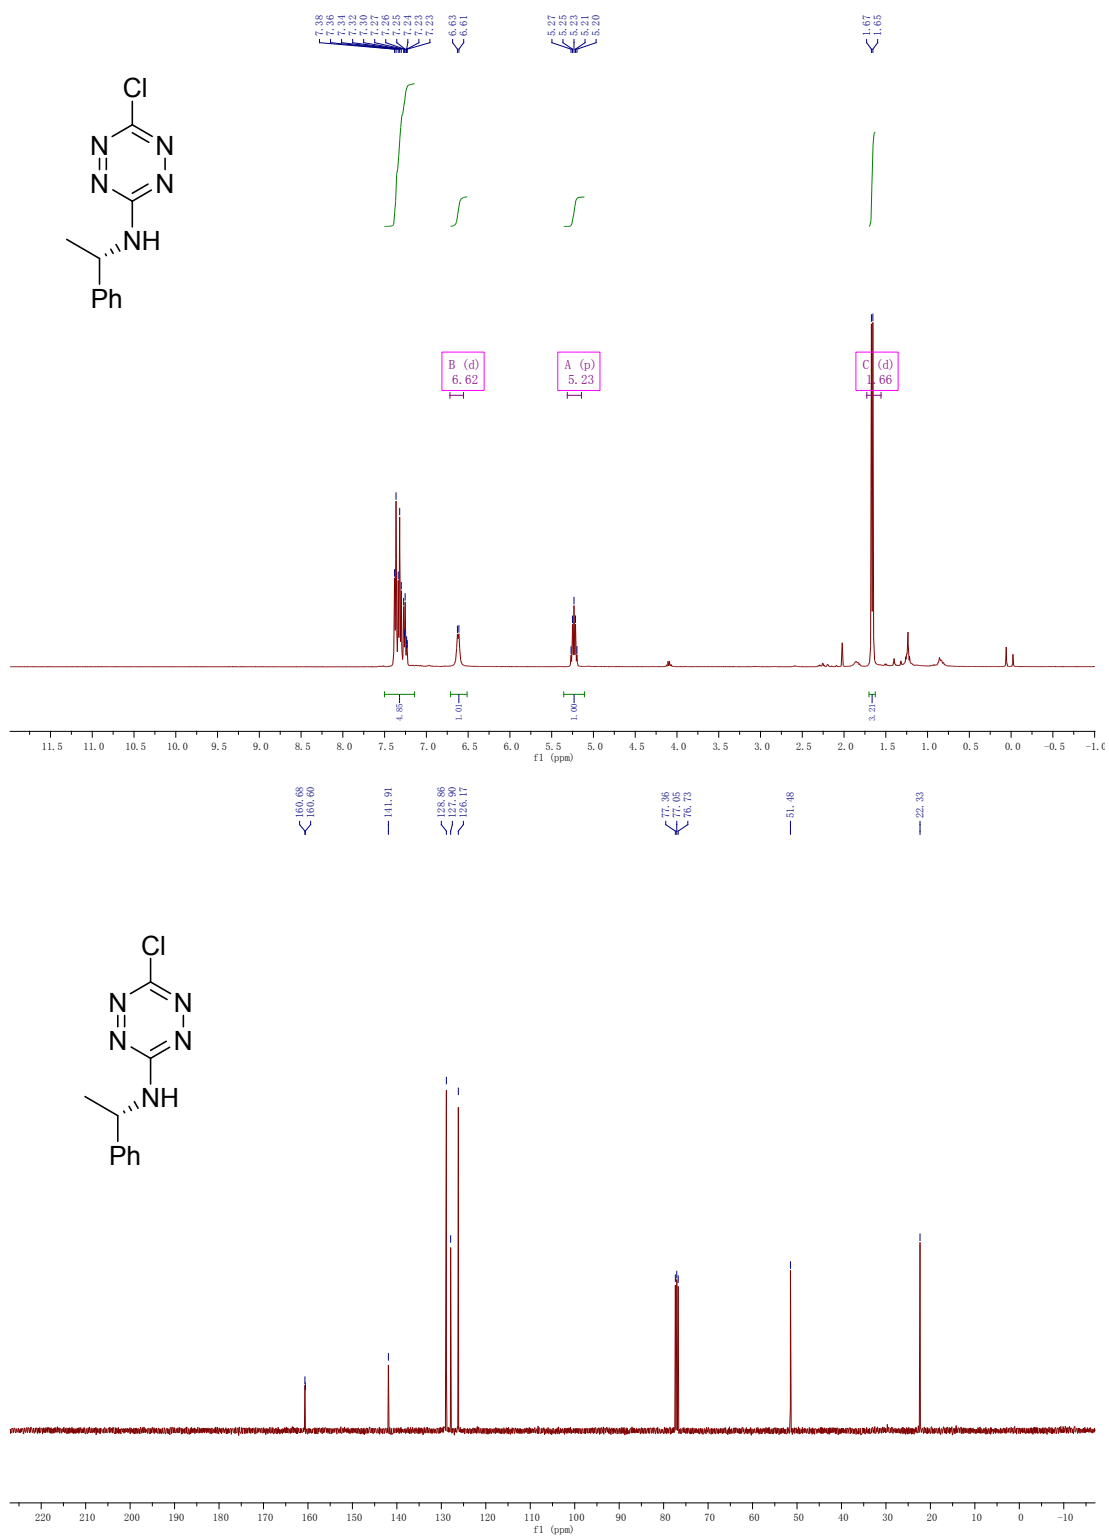

**Fig. S3** <sup>1</sup>H and <sup>13</sup>C NMR spectra of (S)-6-chloro-N-(1-phenylethyl)-1,2,4,5-tetrazin-3-amine

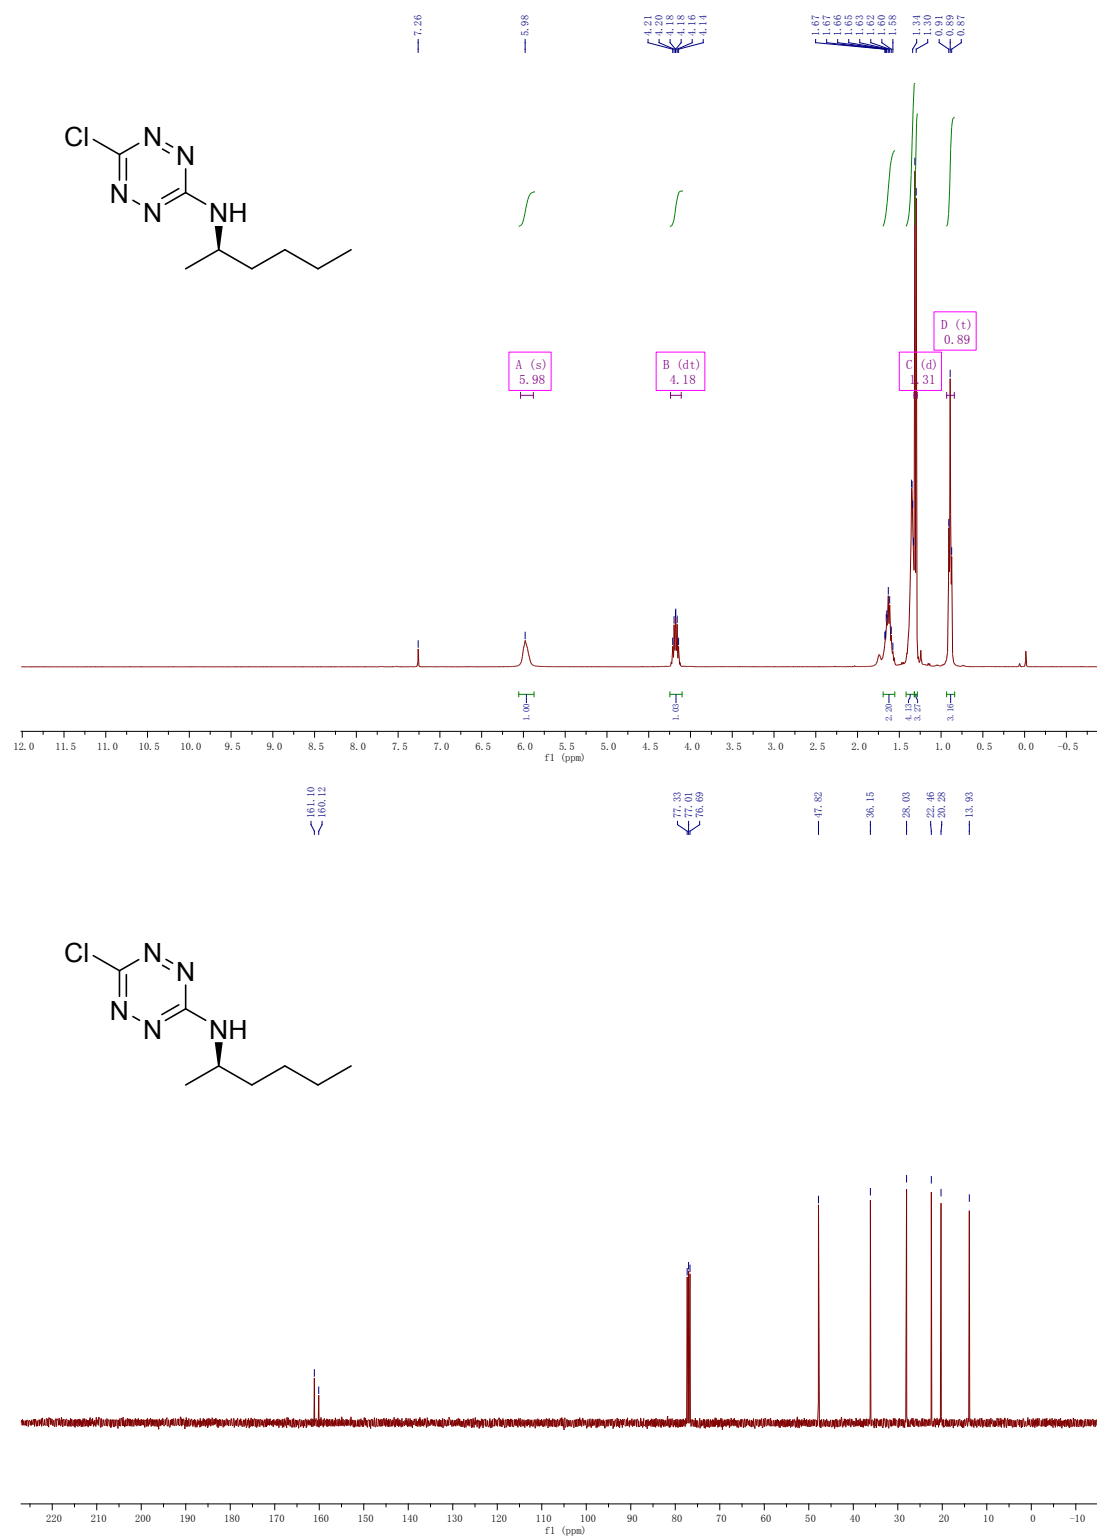

**Fig. S4** <sup>1</sup>H and <sup>13</sup>C NMR spectra of (R)-6-chloro-N-(hexan-2-yl)-1,2,4,5-tetrazin-3-amine

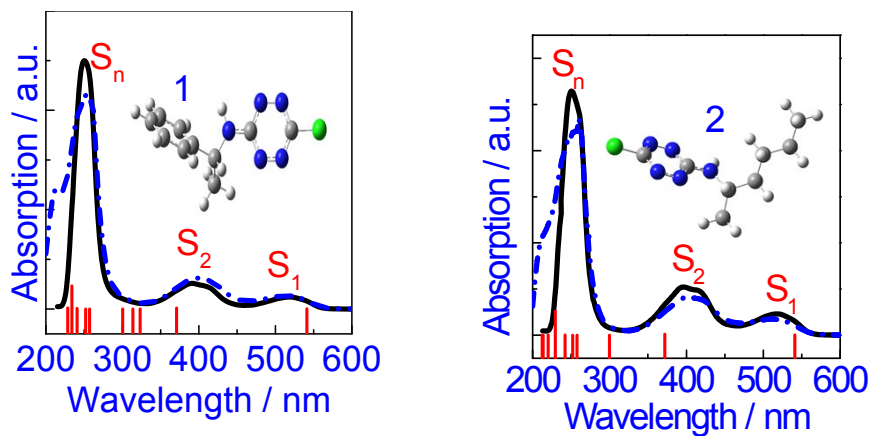

**Fig. S5** Comparison of experimental absorption spectra (solid lines) and theoretically calculated spectra (dashed lines) at the B3LYP6-31g(d) level in vacuum (96 excitations) for **1** and **2**. the oscillator strength of each transition is represented by sticks. The inset: the twisted molecular geometry of **1** and **2**.



**Table S1.** TD-DFT calculated the first 10 transitions, corresponding excitation energies (vertical transition) and wavelength, and their oscillation strength (f) at the B3LYP-6-31g(d) level for **1** and **2**.

**Molecule 1**

| Transition | Energy (eV) | Wavelength (nm) | Oscillation Strength |
|------------|-------------|-----------------|----------------------|
| 1          | 2.3240      | 533.51          | 0.0051               |
| 2          | 3.2139      | 385.77          | 0.0239               |
| 3          | 3.5511      | 349.14          | 0.0004               |
| 4          | 3.6456      | 340.10          | 0.0002               |
| 5          | 4.2213      | 293.71          | 0.0002               |
| 6          | 4.8505      | 255.61          | 0.0006               |
| 7          | 5.0253      | 246.72          | 0.0003               |
| 8          | 5.1640      | 240.09          | 0.1021               |
| 9          | 5.2194      | 237.54          | 0.5772               |
| 10         | 5.3538      | 231.58          | 0.0630               |

**Molecule 2**

| Transition | Energy (eV) | Wavelength (nm) | Oscillation Strength |
|------------|-------------|-----------------|----------------------|
| 1          | 2.3209      | 534.20          | 0.0052               |
| 2          | 3.1957      | 387.97          | 0.0234               |
| 3          | 4.2240      | 293.52          | 0.0000               |
| 4          | 4.8280      | 256.80          | 0.0006               |
| 5          | 5.0255      | 246.71          | 0.0008               |
| 6          | 5.0732      | 244.39          | 0.0112               |
| 7          | 5.2731      | 235.13          | 0.5978               |
| 8          | 5.3817      | 230.38          | 0.0376               |
| 9          | 5.4811      | 226.21          | 0.0038               |
| 10         | 5.6531      | 219.32          | 0.0001               |

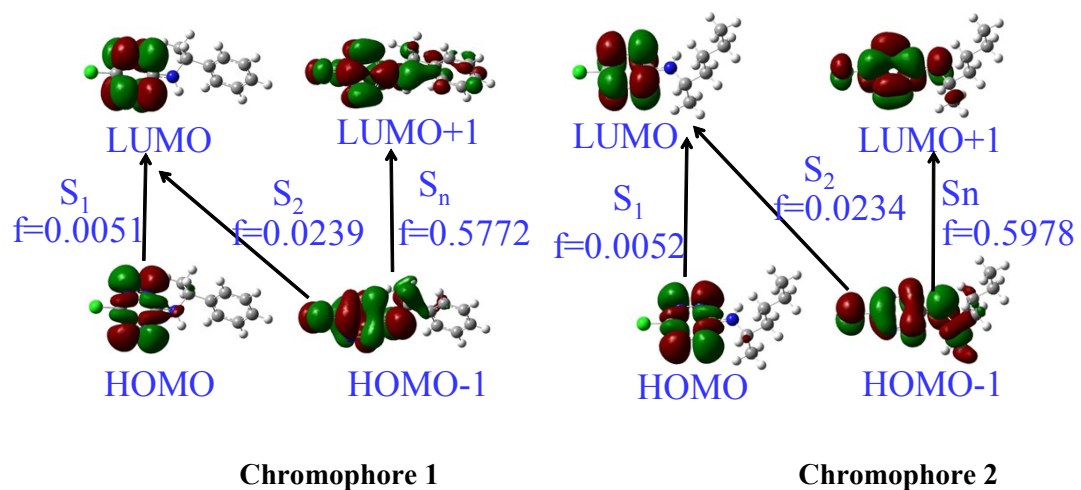

**Fig. S6** Pictorial drawing of frontier orbitals, transitions and oscillation strength of **1** and **2**, calculated at the B3LYP-6-31g(d) level.

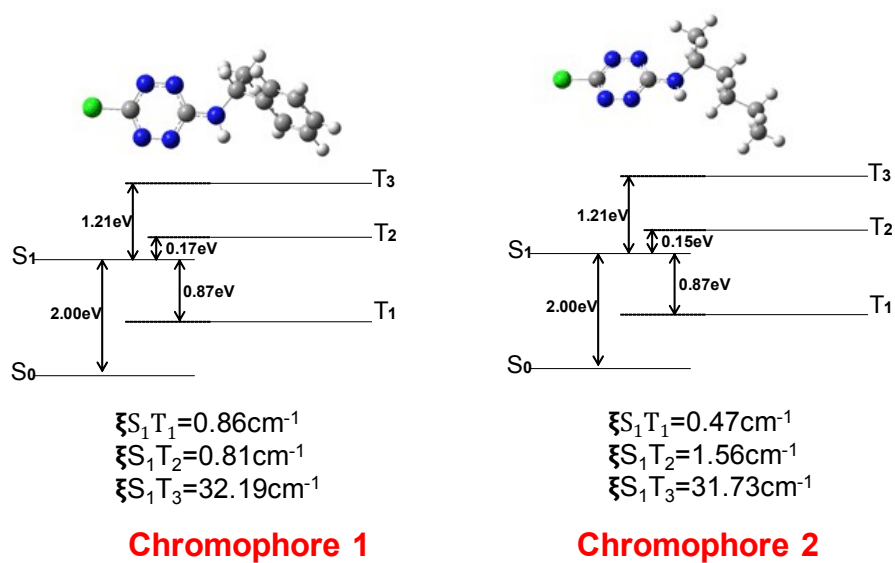

**Fig. S7** Calculated vertical excitation energies of  $S_0$ ,  $S_1$ ,  $T_1$ ,  $T_2$  and  $T_3$  states at fixed geometry and estimated average spin-orbit coupling (SOC) between these excited electronic states.

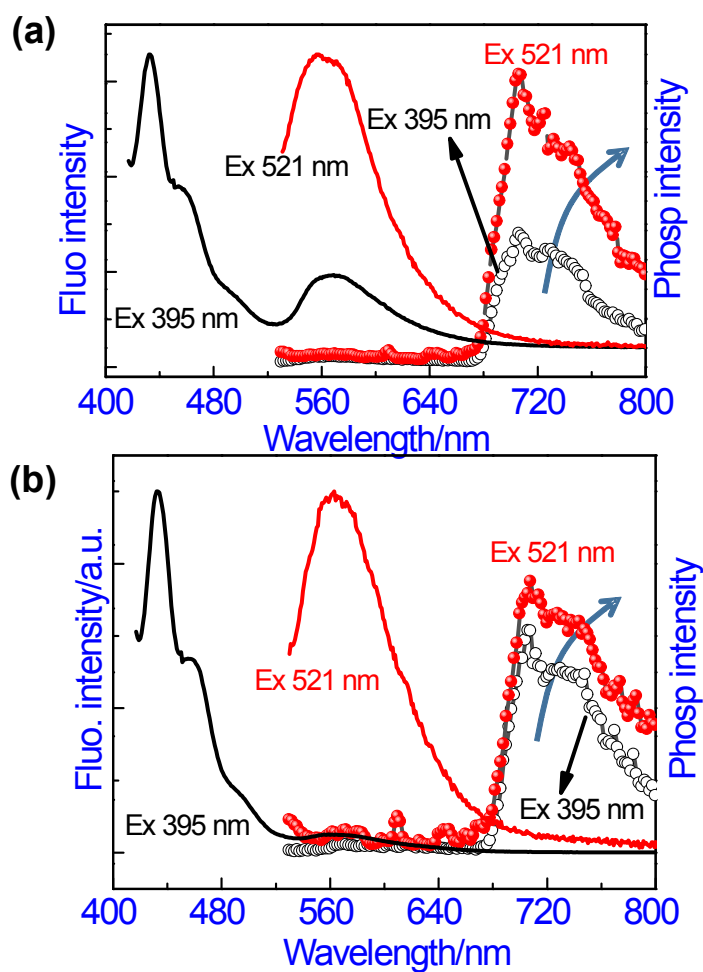

**Fig. S8** fluorescence and phosphorescence spectra for **1** and **2**. The phosphorescence spectra were measured at 70 K.

### References:

1. Y. -H. Gong, F. Miomandre, R. Méallet-Renault, S. Badré, L. Galmiche, J. Tang, P. Audebert, and G. Clavier, *Eur. J. Org. Chem.* 2009, **2009**, 6121-6128; C. Allain, J. Piard, A. Brosseau, M. Han, J. Paquier, T. Marchandier, M. Lequeux, C. Boissière, and P. Audebert, *ACS Appl. Mater. Interfaces* 2016, **8**, 19843-19846.
2. W. Hu, M. Xie, H. Zhao, Y. Tang, S. Yao, T. He, C. Ye, Q. Wang, X. Lu, W. Huang, and Q. Fan, *Chem. Sci.* 2018, **9**, 999.
3. Z. An, C. Zheng, Y. Tao, R. Chen, H. Shi, T. Chen, Z. Wang, H. Li, R. Deng, X. Liu, and W. Huang, *Nat. Mater.* 2015, **14**, 685.
4. W. Hu, Q. Wang, X. Miao, L. Bai, L. Li, G. S. He, J. Li, S. Yao, T. He, X. Lu, W. Huang, P. N. Prasad, Q. Fan, *J. Phys. Chem. C* 2018, **122**, 20945.
